# Supplementary material
Source: Royal Society of Chemistry journal article supplement (doi:10.1039/d6cc01148a)
Supplement: d6cc01148a1.pdf [file d6cc01148a1.pdf]

## Supporting Information

### **Interface engineering of *fcc*-RuCo@*hcp*-Ru core-shell nanoplates for efficient industrial alkaline hydrogen evolution**

*Shihuan Hong<sup>a</sup>, Ning Song<sup>a</sup>, Wenli Zhang<sup>a</sup>, Deping Wang<sup>a</sup>, Lichun Liu<sup>b\*</sup>, Hongjun Dong<sup>a</sup>, Yang-Yang Yu<sup>c\*</sup>, Chunmei Li<sup>a\*</sup>*

<sup>a</sup>Institute of Green Chemistry and Chemical Technology, School of Chemistry and Chemical Engineering, Jiangsu University, Zhenjiang 212013, P.R. China.

<sup>b</sup>College of Biological, Chemical Sciences and Engineering & Nanotechnology Research Institute, Jiaxing University, Jiaxing 314001, P.R. China

<sup>c</sup>Information Materials and Intelligent Sensing Laboratory of Anhui Province, Institutes of Physical Science and Information Technology, Anhui University, Hefei 230601, P.R. China.

\*Corresponding authors: E-mail: lichun.liu@zjxu.edu.cn; yyyu@ahu.edu.cn;

lichun\_mei\_happy@126.com

## Experimental section

**Chemicals.** Platinum on carbon (Pt/C, 5 wt %, AR), ruthenium(III) chloride ( $\text{RuCl}_3$ , 99%, AR) were purchased from Shanghai Macklin Biochemical Co., Ltd. Cobalt(II) chloride ( $\text{CoCl}_2$ , 98%, AR), potassium hydroxide (KOH, 99%, AR), polyvinylpyrrolidone (PVP, MW=8000) were purchased from Aladdin Chemical Reagents Co., Ltd. Formaldehyde (HCHO), acetone ( $\geq 99.5\%$ , AR), ethanol (AR) were purchased from Sinopharm Chemical Reagent Co., Ltd. Nafion (5 wt %, AR) was purchased from Alfa Aesar. Deionized (DI) water was employed as solvent.

**Synthesis of the samples.** A mixture of 0.12 mmol ruthenium(III) chloride ( $\text{RuCl}_3$ ) and 0.4 mmol cobalt(II) chloride ( $\text{CoCl}_2$ ) was dissolved in 20 mL deionized water and stirred at room temperature for 15 minutes to form a homogeneous solution. Subsequently, 100 mg polyvinylpyrrolidone (PVP) and 2 mL formaldehyde (HCHO) were added, and stirring was continued for 4 hours to reduce the metal precursors and initiate nanoparticle nucleation. The dispersed solution was transferred into a 50 mL Teflon-lined stainless-steel autoclave and subjected to hydrothermal treatment at 160 °C for 4 hours, inducing a crystal phase transition (coexisting face-centered cubic, *fcc*, and hexagonal close-packed, *hcp*, phases). After natural cooling to room temperature, the product was collected by centrifugation at 16,000 rpm for 5 minutes and washed three times with acetone and ethanol, respectively, to remove impurities. The final product,  $\text{Ru}_{12}(\text{fcc}_{0.86})\text{Co}_{40}@\text{Ru}_{12}(\text{hcp}_{0.14})$  nanoparticles with a heterostructure, was obtained. By adjusting the initial Ru:Co molar ratios (6:46, 26:26, 40:12, 52:0), other samples—including  $\text{Ru}_6(\text{fcc}_{0.84})\text{Co}_{46}@\text{Ru}_6(\text{hcp}_{0.16})$ ,  $\text{Ru}_{26}(\text{fcc}_{0.88})\text{Co}_{26}@\text{Ru}_{26}(\text{hcp}_{0.12})$ ,  $\text{Ru}_{40}(\text{fcc}_{0.90})\text{Co}_{12}@\text{Ru}_{40}(\text{hcp}_{0.10})$ , and pure *hcp*-phase  $\text{Ru}_{\text{hcp}}$  were synthesized.

**Preparation the working electrode.** Typically, the ink was prepared by dispersing 5 mg of samples into a 1 mL mixture containing 960  $\mu\text{L}$  of ethanol and 40  $\mu\text{L}$  of Nafion (5 wt %) with ultrasonic treatment for 30 minutes. Subsequently, the prepared ink of all catalysts was deposited onto carbon paper ( $0.25 \times 0.25 \text{ cm}^2$ ) to achieve a loading density of  $2.4 \text{ mg cm}^{-2}$ . After drying, the working electrodes were obtained. Electrochemical tests were conducted using a VERSTAT-3 (Princeton Applied Research, America) electrochemical workstation with a conventional three-electrode

system at room temperature. In this system, the sample-coated carbon paper electrode served as the working electrode, while the Hg/HgO electrode and platinum sheet acted as the reference and counter electrodes, respectively. 1 M KOH solution was utilized as the electrolyte.

**Materials characterization.** X-ray diffraction (XRD) was recorded by a D/MAX-2500 diffractometer (Rigaku, Japan) with a Cu K $\alpha$  radiation source from 10–80°. Transmission electron microscopy (TEM), high-magnification TEM (HRTEM), and scanning TEM (STEM) images were conducted on H-7800 electron microscope with an accelerating voltage of 200 kV. In addition, the chemical state of the sample was studied by the X-ray photoelectron spectroscopy (XPS) (Thermo Scientific K-Alpha). All XPS spectra were corrected using the C 1s line at 284.6 eV. Curve fitting and background subtraction were accomplished. The content of catalyst was characterized by Inductively Coupled Plasma Optical Emission Spectrometry (ICP-OES 5800). The Brunauer-Emmett-Teller (BET) specific surface area and average pore diameter distribution were recorded by using a Micromeritics TriStar II3020 instrument.

**In-situ Raman study:** In-situ Raman study was carried out with a confocal microscopic Raman spectrometer (LabRam HR, Horiba, France). To enhance the signal intensity, a strategy called shell-isolated nanoparticle enhanced Raman spectroscopy (SHINERS) **was employed**. Briefly, 55 nm Au nanoparticles coated with a layer of 2 nm SiO<sub>2</sub> (SHINs) was prepared according to their protocol, and the surface-enhanced Raman spectroscopy (SERS) effect as well as the completeness of the SiO<sub>2</sub> shell were confirmed with pyridine as a probing molecule. To load the catalyst and SHINs, catalyst was dispersed in the water to a concentration of 1 mg mL<sup>-1</sup>. 20  $\mu$ L of dispersion was dropped on a polished Au electrode, and vacuum dried under 60 °C. 20  $\mu$ L of concentrated SHINs solution was then dropped on the black spot formed, and vacuum dried again. After that, the Au electrode was assembled in a spectroelectrochemical cell (Model C031–3, GaossUnion, Hubei, China), and the cell was connected to CHI760 bipotentiostat (Chenhua Instrument Co. Ltd, China). The Raman tests were conducted with a 785 nm laser for excitation, and the ND filter was set to 25%, with an acquisition time of 30 s.

**Electrochemical measurements.** All electrochemical properties were collected using a three-electrode electrochemical system at room temperature. The electrocatalytic HER was characterized in 1M KOH with a scan rate of 5 mV s<sup>-1</sup>, and the electropotential for hydrogen evolution was evaluated at 10 and 1000 mA cm<sup>-2</sup> current density. Furthermore, the HER potentials was converted to standard reversible hydrogen electrode (RHE) scale according to the equation:  $E \text{ (vs. RHE)} = E \text{ (vs. Hg/HgO)} + 0.059 \cdot \text{pH} + 0.098 \text{ V}$ . The polarization curves of the HER was iR-corrected. The Tafel slopes was calculated according to the Tafel equation:  $\eta = b \log j + a$ , where  $\eta$  is the overpotential,  $b$  is the Tafel slope,  $j$  is the current density and  $a$  is the Tafel intercept relative to the exchange current density  $j_0$ . Electrochemical impedance spectroscopy (EIS) measurements were carried out in the frequency range of 10<sup>5</sup> to 0.01 Hz with AC amplitude of 10 mV. The double layer capacitance ( $C_{dl}$ ) was determined by cyclic voltammetry curves measured by scan rates of 60, 70,80, 90, and 100 mV s<sup>-1</sup>.

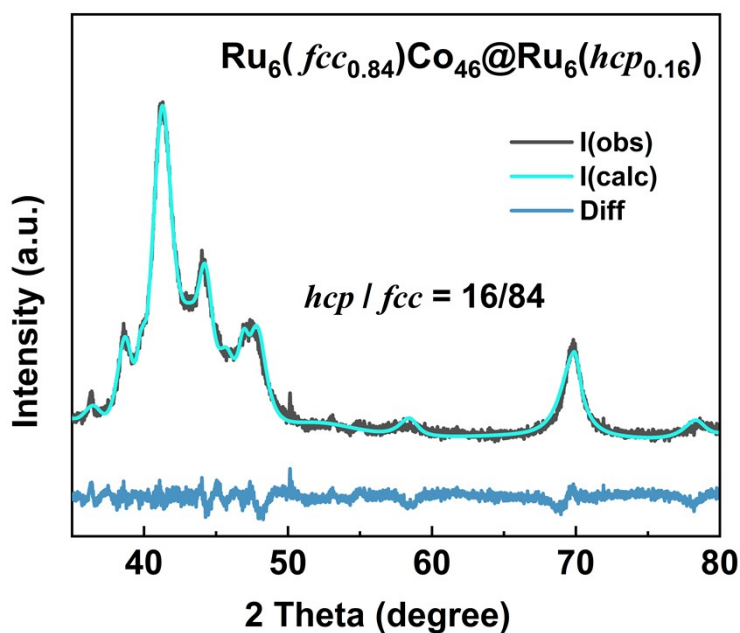

**Figure S1.** Rietveld refinement of the XRD pattern for the Ru<sub>6</sub>(*fcc*<sub>0.84</sub>)Co<sub>46</sub>@Ru<sub>6</sub>(*hcp*<sub>0.16</sub>) sample.

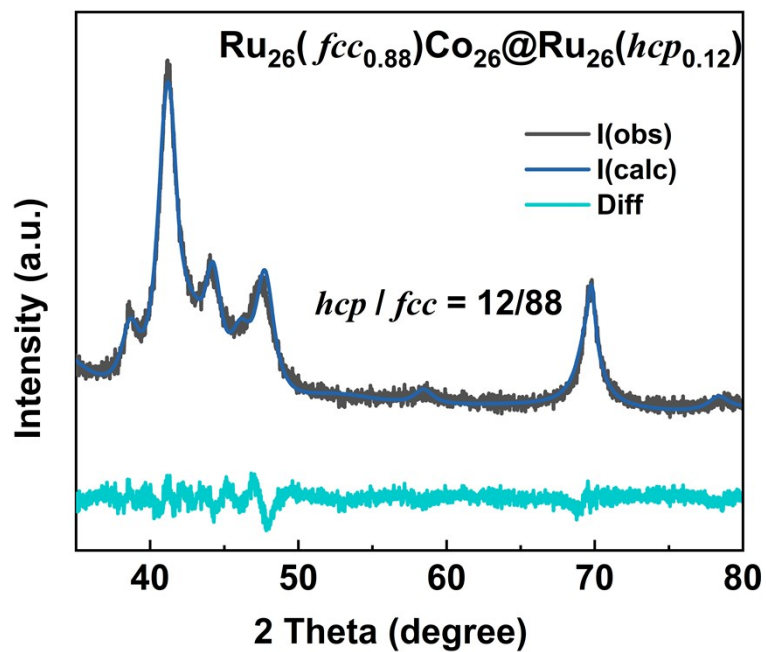

**Figure S2.** Rietveld refinement of the XRD pattern for the Ru<sub>26</sub>(*fcc*<sub>0.88</sub>)Co<sub>26</sub>@Ru<sub>26</sub>(*hcp*<sub>0.12</sub>) sample.

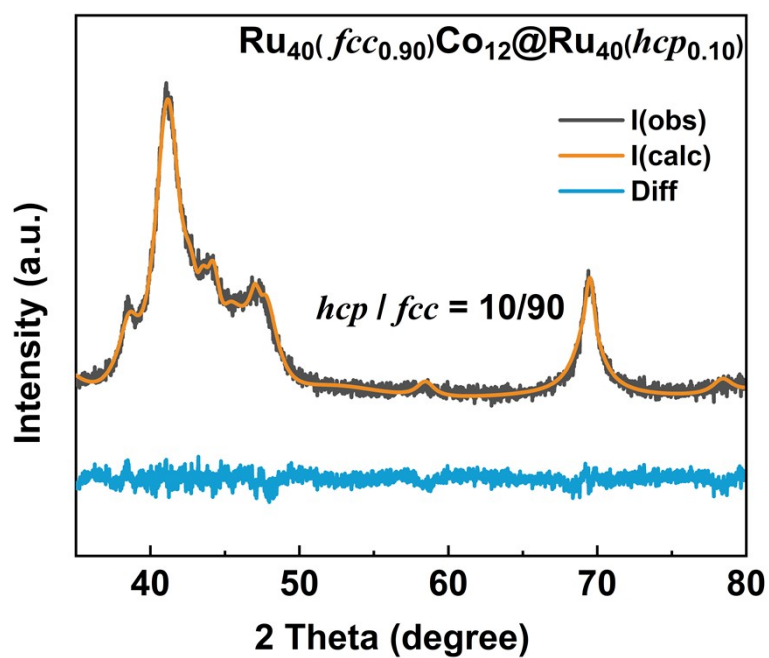

**Figure S3.** Rietveld refinement of the XRD pattern for the Ru<sub>40</sub>(*fcc*<sub>0.90</sub>)Co<sub>12</sub>@Ru<sub>40</sub>(*hcp*<sub>0.10</sub>) sample.

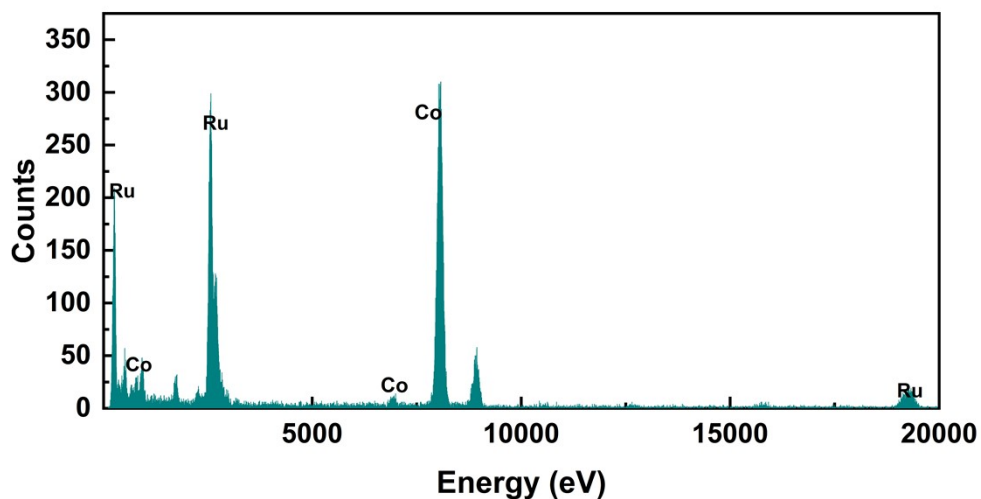

Figure S4. EDX spectrum of  $\text{Ru}_{12}(\text{fcc}_{0.86})\text{Co}_{40}@\text{Ru}_{12}(\text{hcp}_{0.14})$ .

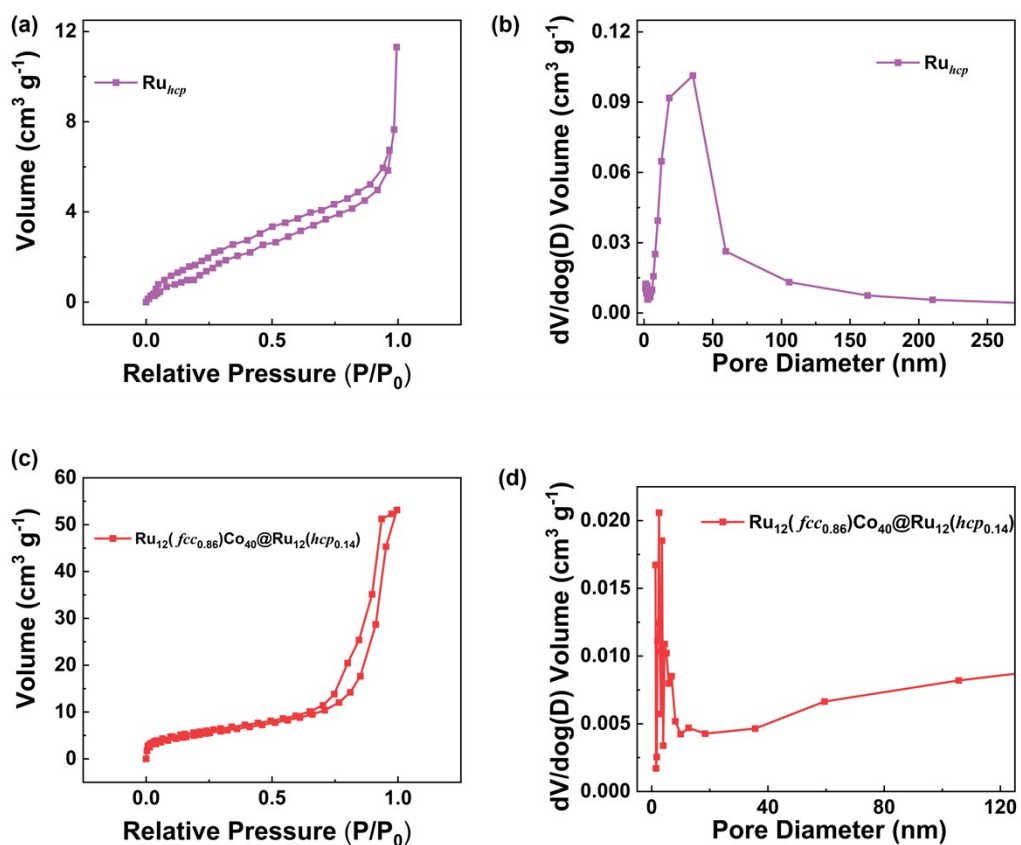

Figure S5. (a,c)  $\text{N}_2$  sorption isotherms, (b,d) the pore size distribution derived from adsorption branch of the  $\text{Ru}_{\text{hcp}}$  and  $\text{Ru}_{12}(\text{fcc}_{0.86})\text{Co}_{40}@\text{Ru}_{12}(\text{hcp}_{0.14})$  catalyst.

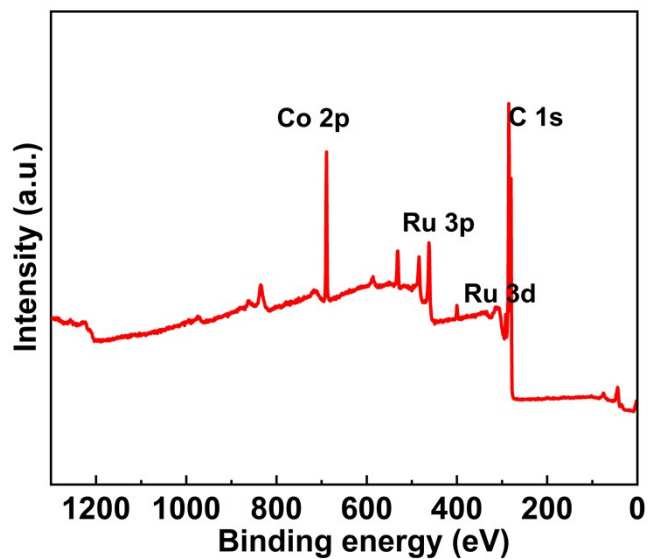

**Figure S6.** XPS survey spectrum of  $\text{Ru}_{12}(\text{fcc}_{0.86})\text{Co}_{40}@\text{Ru}_{12}(\text{hcp}_{0.14})$ .

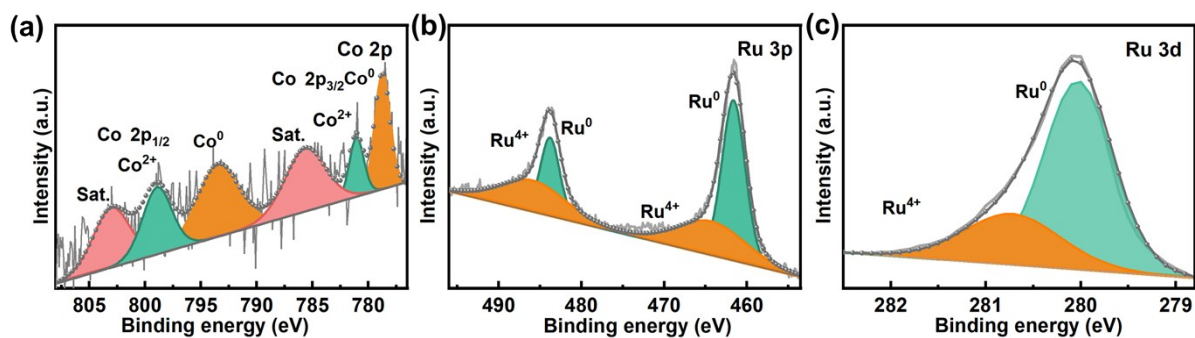

**Figure S7.** (a) Co 2p, (b) Ru 3p, and (c) Ru 3d XPS spectra of  $\text{Ru}_{12}(\text{fcc}_{0.86})\text{Co}_{40}@\text{Ru}_{12}(\text{hcp}_{0.14})$  alloys.

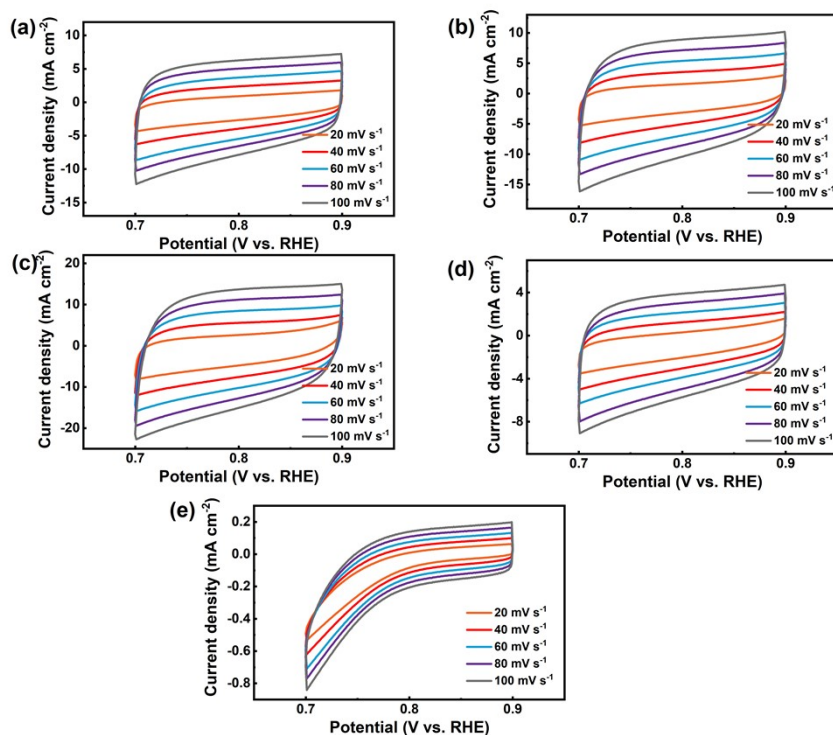

**Figure S8.** Cyclic voltammograms of (a-e)  $\text{Ru}_6(\text{fcc}_{0.84})\text{Co}_{46}@\text{Ru}_6(\text{hcp}_{0.16})$ ,  $\text{Ru}_{12}(\text{fcc}_{0.86})\text{Co}_{40}@\text{Ru}_{12}(\text{hcp}_{0.14})$ ,  $\text{Ru}_{26}(\text{fcc}_{0.88})\text{Co}_{26}@\text{Ru}_{26}(\text{hcp}_{0.12})$ ,  $\text{Ru}_{40}(\text{fcc}_{0.90})\text{Co}_{12}@\text{Ru}_{40}(\text{hcp}_{0.10})$ , and  $\text{Ru}_{\text{hcp}}$  in the region of 0.7 - 0.9 V versus Hg/HgO at different scan rates.

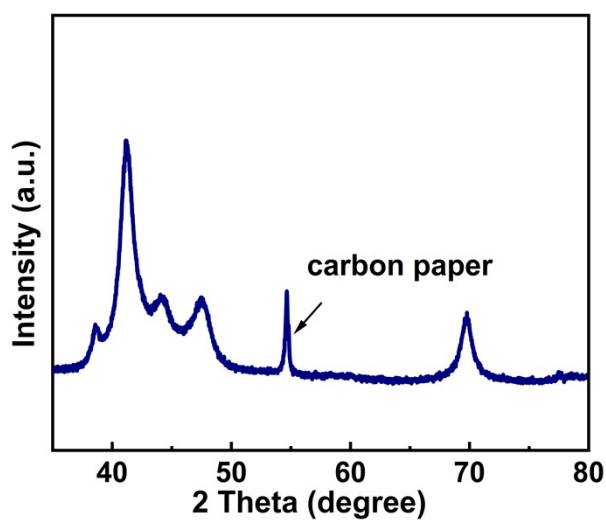

**Figure S9.** XRD pattern of  $\text{Ru}_{12}(\text{fcc}_{0.86})\text{Co}_{40}@\text{Ru}_{12}(\text{hcp}_{0.14})$  after HER electrolysis.

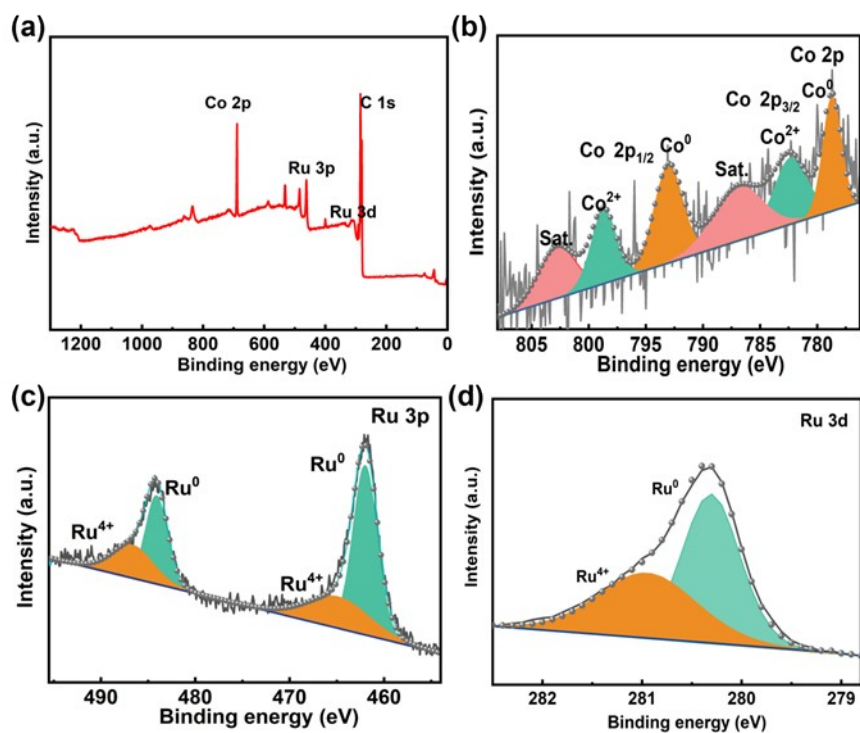

**Figure S10.** XPS spectrum of  $\text{Ru}_{12}(\text{fcc}_{0.86})\text{Co}_{40}@\text{Ru}_{12}(\text{hcp}_{0.14})$ : (a) Survey spectrum and (b) high-resolution Co 2p, Ru 3p, and Ru3d.

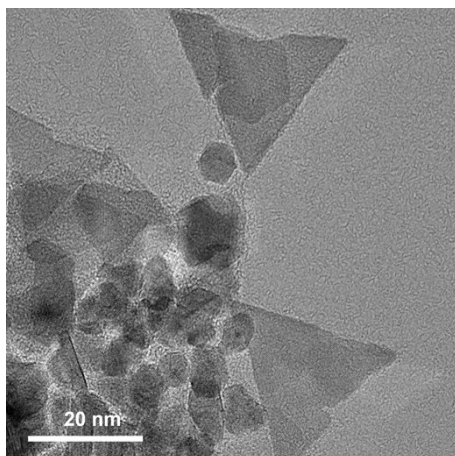

**Figure S11.** TEM image of  $\text{Ru}_{12}(\text{fcc}_{0.86})\text{Co}_{40}@\text{Ru}_{12}(\text{hcp}_{0.14})$  alloy after HER electrolysis.

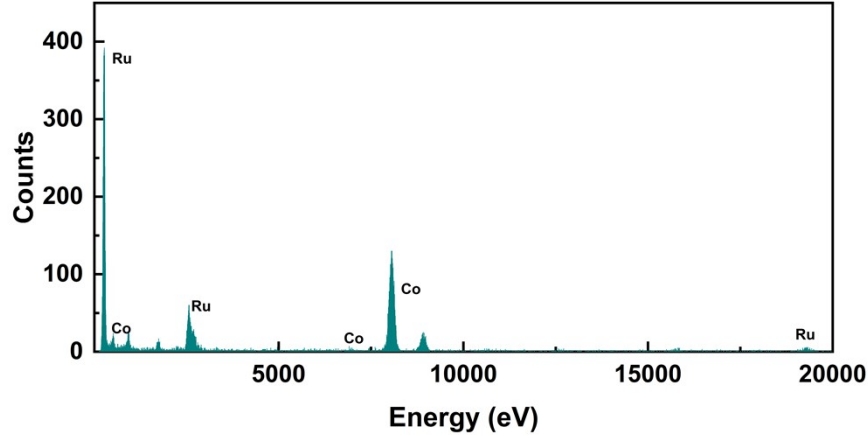

**Figure S12.** EDX spectrum of  $\text{Ru}_{12}(\text{fcc}_{0.86})\text{Co}_{40}@\text{Ru}_{12}(\text{hcp}_{0.14})$  after HER electrolysis.

**Table S1.** Co and Ru contents of  $\text{Ru}_{12}(\text{fcc}_{0.86})\text{Co}_{40}@\text{Ru}_{12}(\text{hcp}_{0.14})$  based on the EDX result.

| Element | Weight % | Atomic % |
|---------|----------|----------|
| Co      | 2.9      | 4.9      |
| Ru      | 97.1     | 95.1     |

**Table S2.** Co and Ru contents of  $\text{Ru}_6(\text{fcc}_{0.84})\text{Co}_{46}@\text{Ru}_6(\text{hcp}_{0.16})$ ,  $\text{Ru}_{12}(\text{fcc}_{0.86})\text{Co}_{40}@\text{Ru}_{12}(\text{hcp}_{0.14})$ ,  $\text{Ru}_{26}(\text{fcc}_{0.88})\text{Co}_{26}@\text{Ru}_{26}(\text{hcp}_{0.12})$ , and  $\text{Ru}_{40}(\text{fcc}_{0.90})\text{Co}_{12}@\text{Ru}_{40}(\text{hcp}_{0.10})$  based on the ICP result.

|                                                                                     | Element | Mass % |
|-------------------------------------------------------------------------------------|---------|--------|
| $\text{Ru}_6(\text{fcc}_{0.84})\text{Co}_{46}@\text{Ru}_6(\text{hcp}_{0.16})$       | Co      | 5.6    |
|                                                                                     | Ru      | 94.4   |
| $\text{Ru}_{12}(\text{fcc}_{0.86})\text{Co}_{40}@\text{Ru}_{12}(\text{hcp}_{0.14})$ | Co      | 5.0    |
|                                                                                     | Ru      | 95.0   |
| $\text{Ru}_{26}(\text{fcc}_{0.88})\text{Co}_{26}@\text{Ru}_{26}(\text{hcp}_{0.12})$ | Co      | 4.9    |
|                                                                                     | Ru      | 95.1   |
| $\text{Ru}_{40}(\text{fcc}_{0.90})\text{Co}_{12}@\text{Ru}_{40}(\text{hcp}_{0.10})$ | Co      | 4.8    |
|                                                                                     | Ru      | 95.2   |

**Table S3.** Comparison of HER activity of the reported electrocatalysts in 1.0 M KOH.

| Electrocatalysts                                                                              | E (mV vs. RHE)                              | Tafel slopes (mv dec <sup>-1</sup> ) | Reference s      |
|-----------------------------------------------------------------------------------------------|---------------------------------------------|--------------------------------------|------------------|
| <b>Ru<sub>12</sub>(fcc<sub>0.86</sub>)Co<sub>40</sub>@Ru<sub>12</sub>(hcp<sub>0.14</sub>)</b> | <b>29.1 mV @ 10 mA cm<sup>-2</sup></b><br>2 | <b>20</b>                            | <b>This work</b> |
| Ru-VO <sub>2</sub>                                                                            | 46 mV @ 10 mA cm <sup>-2</sup>              | 39.1                                 | 1                |
| Ru/TiON-C                                                                                     | 42 mV @ 10 mA cm <sup>-2</sup>              | 40                                   | 2                |
| In5                                                                                           | 67 mV @ 10 mA cm <sup>-2</sup>              | 107                                  | 3                |
| NiCoRu <sub>0.3</sub> /SP                                                                     | 59 mV @ 10 mA cm <sup>-2</sup>              | 53                                   | 4                |
| Ir <sub>2</sub> Ni <sub>8</sub> /NHCSs                                                        | 54 mV @ 10 mA cm <sup>-2</sup>              | 60                                   | 5                |
| MoO <sub>2</sub> -FeP@C                                                                       | 103 mV @ 10 mA cm <sup>-2</sup>             | 48                                   | 6                |
| FeCoNiCuPd                                                                                    | 29 mV @ 10 mA cm <sup>-2</sup>              | 47.2                                 | 7                |
| NiCo DASs/N-C                                                                                 | 189 mV @ 10 mA cm <sup>-2</sup>             | 72.5                                 | 8                |
| Ru/MoO <sub>2</sub>                                                                           | 39 mV @ 10 mA cm <sup>-2</sup>              | 50                                   | 9                |
| PtCoCuNiZn                                                                                    | 33 mV @ 10 mA cm <sup>-2</sup>              | 35                                   | 10               |

**Table S4** Comparison of HER activity of reported electrocatalysts at industrial current densities.

| Electrocatalysts                                                                              | E (mV vs. RHE)                          | Tafel slopes (mv dec <sup>-1</sup> ) | Time         | Reference s      |
|-----------------------------------------------------------------------------------------------|-----------------------------------------|--------------------------------------|--------------|------------------|
| <b>Ru<sub>12</sub>(fcc<sub>0.86</sub>)Co<sub>40</sub>@Ru<sub>12</sub>(hcp<sub>0.14</sub>)</b> | <b>377 mV @ 1000 mA cm<sup>-2</sup></b> | <b>20</b>                            | <b>200 h</b> | <b>This work</b> |
| MIL-(IrNiFe)@NF                                                                               | 690 mV @ 1000 mA cm <sup>-2</sup>       | 53                                   | 24 h         | 11               |
| WMoC                                                                                          | 400 mV @ 1000 mA cm <sup>-2</sup>       | 65                                   | 200 h        | 12               |
| D-EHEA-Zr <sub>0.25</sub>                                                                     | 370 mV @ 1000 mA cm <sup>-2</sup>       | 44.9                                 | 150 h        | 13               |
| Ni <sub>3</sub> S <sub>2</sub> @LiMoNiO <sub>x</sub> (OH) <sub>y</sub>                        | 365 mV @ 1000 mA cm <sup>-2</sup>       | 78.9                                 | 100 h        | 14               |
| Ni <sub>3</sub> P/MnOOH                                                                       | 341 mV @ 1000 mA cm <sup>-2</sup>       | 81.4                                 | 50 h         | 15               |
| V <sub>0.3</sub> Mo <sub>0.7</sub> B                                                          | 452 mV @ 1000 mA cm <sup>-2</sup>       | 60                                   | 28 h         | 16               |
| NiCoS <sub>x</sub> @CoCH NAs/NF                                                               | 412 mV @ 1000 mA cm <sup>-2</sup>       | 63                                   | 200 h        | 17               |
| CoP/MoP@NC/CC                                                                                 | 475 mV @ 1000 mA cm <sup>-2</sup>       | 52                                   | 20 h         | 18               |
| Sn-Ni <sub>3</sub> S <sub>2</sub> /NF                                                         | 570 mV @ 1000 mA cm <sup>-2</sup>       | 55.6                                 | 60 h         | 19               |

**Table S5.** The fitting results of electrochemical element parameters from electrochemical impedance spectroscopy (EIS) for catalysts of HER.

| Samples                                                                                                          | R <sub>s</sub> | R <sub>ct</sub> | CPE <sub>0</sub> |
|------------------------------------------------------------------------------------------------------------------|----------------|-----------------|------------------|
| Ru <sub>40</sub> ( <i>fcc</i> <sub>0.90</sub> )Co <sub>12</sub> @Ru <sub>40</sub> ( <i>hcp</i> <sub>0.10</sub> ) | 4.2            | 11.9            | 0.80             |
| Ru <sub>26</sub> ( <i>fcc</i> <sub>0.88</sub> )Co <sub>26</sub> @Ru <sub>26</sub> ( <i>hcp</i> <sub>0.12</sub> ) | 4.9            | 7.2             | 0.67             |
| Ru <sub>12</sub> ( <i>fcc</i> <sub>0.86</sub> )Co <sub>40</sub> @Ru <sub>12</sub> ( <i>hcp</i> <sub>0.14</sub> ) | 4.5            | 2.2             | 0.71             |
| Ru <sub>6</sub> ( <i>fcc</i> <sub>0.84</sub> )Co <sub>46</sub> @Ru <sub>6</sub> ( <i>hcp</i> <sub>0.16</sub> )   | 4.3            | 59              | 0.86             |
| Ru <sub>hcp</sub>                                                                                                | 4.4            | 110             | 0.73             |

R<sub>s</sub> shows the resistance of the electrolyte and intrinsic resistance of the active materials on the electrode. R<sub>ct</sub> represents charge transfer resistance, which determines the interfacial electron.

## References

1. Z. Niu, Z. Lu, Z. Qiao, S. Wang, X. Cao, X. Chen, J. Yun, L. Zheng and D. Cao, *Adv. Mater.*, 2023, 36, 2310690.
2. M. Smiljanić, M. Bele, L. Pavko, A. Hrnjić, F. Ruiz-Zepeda, L. Bijelić, A. R. Kamšek, M. Nuhanović, A. Marsel, L. Gašparič, A. Kokalj and N. Hodnik, *Chem. Engin. J.*, 2025, 517, 164204.
3. S. Mondal, S. Dutta, S. Mal, S. K. Pati and S. Bhattacharyya, *Angew. Chem. Int. Ed. Engl.*, 2023, 62, e202301269.
4. L. Li, H. Qiu, Y. Zhu, G. Chen, S. She, X. Guo, H. Li, T. Liu, Z. Lin, H. Zhou, Y. Zhu, M. Yang, B. Xu and H. Huang, *Appl Catal, B-Environ*, 2023, 331, 117965.
5. N. Wei, M. Mao, J. Wu, Y. Long and G. Fan, *Fuel*, 2022, 319, 123637.
6. G. Yang, Y. Jiao, H. Yan, Y. Xie, A. Wu, X. Dong, D. Guo, C. Tian and H. Fu, *Adv. Mater.*, 2020, 32, 2000455.
7. S. Wang, B. Xu, W. Huo, H. Feng, X. Zhou, F. Fang, Z. Xie, J. K. Shang and J. Jiang, *Appl Catal, B-Environ*, 2022, 313, 121472.
8. M. Li, H. Zhu, Q. Yuan, T. Li, M. Wang, P. Zhang, Y. Zhao, D. Qin, W. Guo, B. Liu, X. Yang, Y. Liu and Y. Pan, *Adv. Funct. Mater.*, 2022, 33, 2210867.
9. P. Ren, W. Wang, Y. Hong, Y. Zheng, X. Ren, W. Du, Y. Chen, S. Tan and W. Zhang, *ACS Appl. Nano Mater.*, 2023, 6, 13926-13934.
10. H. Ren, Z. Zhang, Z. Geng, Z. Wang F. Shen, X. Liang, Z. Cai, Y. Wang, D. Cheng, Y. Cao, X. Yang, M. Hu, X. Yao and K. Zhou, *Adv. Energy Mater.*, 2024, 14, 240077.
11. Q. Kong, C. Yu, Q. Lu, X. Yang, T. Xu, Q. Song, H. Li, Z. H. Liu, Q. Qiao, G. He, Y. Wang, L. Yao, X. Dai and X. Zhang, *Small*, 2025, 21, 2503398.
12. L. Shen, Y. Shi, T. O. Ogundipe, K. Huang, S. Cao, Z. Lu, Z. Wang, H. Tan and C. Yan, *J. Power*

- Sources, 2022, 538, 231557.
13. Q. Zhang, Q. Guo, Y. Zhang, Y. He, W. Gong, W. Liu, X. Liu and R. Li, *Adv. Funct. Mater.*, 2024, 35, 2414446.
  14. Q.-N. Ha, N. Susanto Gultom, M. Zefanya Silitonga, T. Negash Gameda and D.-H. Kuo, *Chem. Eng. J.*, 2023, 467, 143253.
  15. P. Jiang, H. Huang, J. Diao, S. Gong, S. Chen, J. Lu, C. Wang, Z. Sun, G. Xia, K. Yang, Y. Yang, L. Wei and Q. Chen, *Appl. Catal, B-Environ.*, 2019, 258, 117965.
  16. C. Zhang, Y. Luo, J. Tan, Q. Yu, F. Yang, Z. Zhang, L. Yang, H.-M. Cheng and B. Liu, *Nat. Commun.*, 2020, 11, 3724.
  17. C. Li, Z. Wang, M. Liu, E. Wang, B. Wang, L. Xu, K. Jiang, S. Fan, Y. Sun, J. Li and K. Liu, *Nat. Commun.*, 2022, 13, 3338.
  18. Y. Cheng, H. Chen, L. Zhang, X. Xu, H. Cheng, C. Yan and T. Qian, *Adv. Mater.*, 2024, 36, 2313156.
  19. Z. Zheng, L. Yu, M. Gao, X. Chen, W. Zhou, C. Ma, L. Wu, J. Zhu, X. Meng, J. Hu, Y. Tu, S. Wu, J. Mao, Z. Tian and D. Deng, *Nat. Commun.*, 2020, 11, 3315.
  20. R. Liu, Z. Gong, J. Liu, J. Dong, J. Liao, H. Liu, H. Huang, J. Liu, M. Yan, K. Huang, H. Gong, J. Zhu, C. Cui, G. Ye and H. Fei, *Adv. Mater.*, 2021, 33, 2103533.
